# Supplementary material
Source: PubMed Central journal article supplement (PMC4256491)

## SUPPLEMENTAL DATA

### SUPPLEMENTAL FIGURES

Supplemental Figure 1. BMMSCs were cultured in osteogenic medium containing 5% serum for 7 days. Transcript expression of the osteogenic and adipogenic markers ALP and PPAR $\gamma$ , respectively, was analyzed by qPCR at Days 3 and 7 to confirm progression of osteogenesis. Values are expressed as a percentage of the Day 3 mean. Error bars are  $\pm$  S.E.M:  $p < 0.01$  (\*\*).

Supplemental Figure 2. BMMSCs were cultured for 6 days (Days 1-7) in osteogenic medium containing 5% serum and Thiamet G (0-20  $\mu$ M) or its DMSO vehicle. OGT and OGA transcript levels were analyzed by qPCR. Transcript expression was normalized against GAPDH as an endogenous reference. Error bars are  $\pm$  S.E.M:  $p < 0.05$  (\*).

Supplemental Figure 3. BMMSCs were cultured in osteogenic medium with 10% serum and rhBMP2/7 (50 ng/mL) or its vehicle. On the left, immunoblot analysis of total protein (25  $\mu$ g) at Day 8. On the right, densitometric analysis of OGA protein levels normalized against GAPDH as a loading control. OGA protein expression was averaged across three independent replications and is expressed as a percentage of the vehicle control mean. The effect of BMP2/7 on elevation of global O-GlcNAc levels observed under osteogenic conditions with 5% serum (Fig. 5A) was masked under 10% serum, possibly due to enhanced baseline O-GlcNAcylation levels resulting from increased concentrations of growth factors and nutrients.

The following supplemental data (pages 4-26) are HCD or ETD MS/MS spectra which support peptide sequencing and assignment of unambiguous HexNAc, phosphorylation, or methylation events (bold). The theoretical fragment ions are in tabular format with the observed peaks underlined. The listed ETD  $m/z$  values are given for  $c$  and  $z$  ions only and not for  $c-1$ ,  $c+1$ , or  $z+1$  fragment ions which may be present in the scan. The gene symbol is given at the top of the page for each unique peptide, along with peptide residue numbers, the assigned site of modification, and the peptide charge state.

Gene: RUNX2

Acc#: Q13950

26-38 +Phospho

+3 charge state

The HCD fragmentation spectrum below contains both modified and unmodified species due to neutral loss of  $H_3PO_4$ .

| <b>b</b>      | <b>b<sup>+2</sup></b> |    |   |    | <b>y</b>      | <b>y<sup>+2</sup></b> |
|---------------|-----------------------|----|---|----|---------------|-----------------------|
| ---           | ---                   | 1  | R | 13 | ---           | ---                   |
| <u>304.18</u> | 152.59                | 2  | F | 12 | 1231.63       | 616.32                |
| 391.21        | 196.11                | 3  | S | 11 | 1084.56       | 542.79                |
| 488.26        | 244.63                | 4  | P | 10 | 997.53        | 499.27                |
| 585.31        | 293.16                | 5  | P | 9  | 900.48        | 450.74                |
| 672.35        | 336.68                | 6  | S | 8  | <u>803.43</u> | 402.22                |
| 759.38        | 380.19                | 7  | S | 7  | <u>716.39</u> | 358.70                |
| 846.41        | 423.71                | 8  | S | 6  | <u>629.36</u> | 315.18                |
| 959.49        | 480.25                | 9  | L | 5  | <u>542.33</u> | 271.67                |
| 1087.55       | 544.28                | 10 | Q | 4  | <u>429.25</u> | 215.13                |
| 1184.61       | 592.81                | 11 | P | 3  | <u>301.19</u> | 151.10                |
| 1241.63       | 621.32                | 12 | G | 2  | <u>204.13</u> | 102.57                |
| ---           | ---                   | 13 | K | 1  | <u>147.11</u> | 74.06                 |

**b<sub>3</sub>+Phospho** 471.18

082813\_SCW\_DrBall\_RNX2 #2411 RT: 68.21 AV: 1 NL: 1.76E4  
T: FTMS + c NSI d Full ms2 489.90@hcd35.00 [100.00-1480.00]

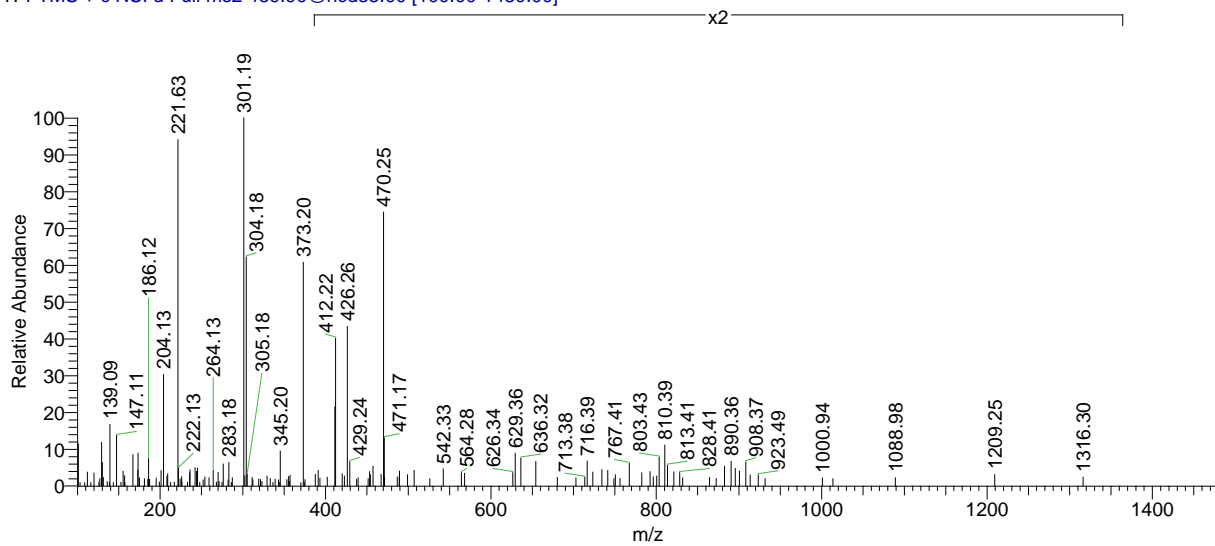

26-38 +Phospho

+3 charge state

The ETD fragmentation spectrum localizes the modification to Ser28

| <b>c</b>       | <b>c<sup>+2</sup></b> |    |                   |    | <b>z</b>       | <b>z<sup>+2</sup></b> |
|----------------|-----------------------|----|-------------------|----|----------------|-----------------------|
| <u>174.13</u>  | 87.57                 | 1  | R                 | 13 | ---            | ---                   |
| <u>321.20</u>  | 161.11                | 2  | F                 | 12 | <u>1295.58</u> | 648.29                |
| ---            | ---                   | 3  | <b>S(Phospho)</b> | 11 | <u>1148.51</u> | 574.76                |
| ---            | ---                   | 4  | P                 | 10 | ---            | ---                   |
| 682.31         | 341.66                | 5  | P                 | 9  | ---            | ---                   |
| <u>769.34</u>  | 385.17                | 6  | S                 | 8  | <u>787.41</u>  | 394.21                |
| <u>856.37</u>  | 428.69                | 7  | S                 | 7  | <u>700.38</u>  | 350.69                |
| <u>943.40</u>  | 472.21                | 8  | S                 | 6  | <u>613.34</u>  | 307.18                |
| <u>1056.49</u> | 528.75                | 9  | L                 | 5  | <u>526.31</u>  | 263.66                |
| ---            | ---                   | 10 | Q                 | 4  | 413.23         | 207.12                |
| <u>1281.60</u> | 641.30                | 11 | P                 | 3  | ---            | ---                   |
| <u>1338.62</u> | 669.81                | 12 | G                 | 2  | <u>188.12</u>  | 94.56                 |
| ---            | ---                   | 13 | K                 | 1  | <u>131.09</u>  | 66.05                 |

MH+2 734.35

MH+3 489.90

082813\_SCW\_DrBall\_RNX2 #2412 RT: 68.22 AV: 1 NL: 4.25E4  
T: ITMS + c NSI d Full ms2 489.90@etd66.67 [50.00-1480.00]

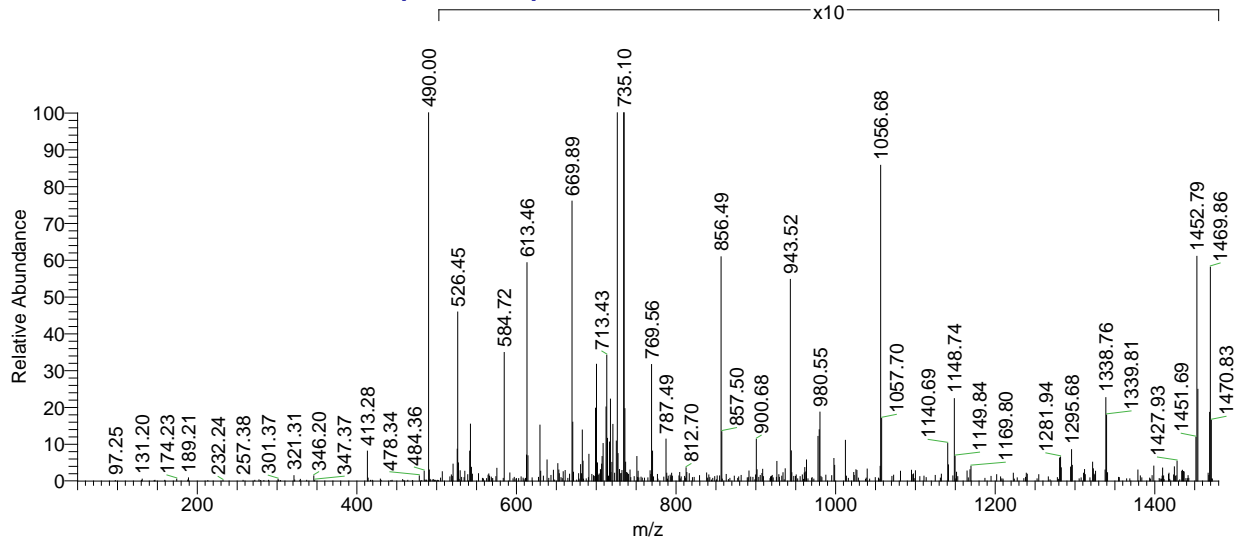

Gene: RUNX2

Acc#: Q13950

26-38 +Phospho, HexNAc

+3 charge state

The HCD fragmentation spectrum contains both modified and unmodified species due to neutral loss of  $H_3PO_4$  and HexNAc. The ETD fragmentation spectrum localizing modification sites to Ser28 (phospho) and Ser32 (HexNAc) is represented in Fig. 2A.

| <b>b</b>      | <b>b<sup>+2</sup></b> |    |   |    | <b>y</b>      | <b>y<sup>+2</sup></b> |
|---------------|-----------------------|----|---|----|---------------|-----------------------|
| ---           | ---                   | 1  | R | 13 | ---           | ---                   |
| 304.18        | 152.59                | 2  | F | 12 | 1231.63       | 616.32                |
| <u>391.21</u> | 196.11                | 3  | S | 11 | 1084.56       | 542.79                |
| <u>488.26</u> | 244.63                | 4  | P | 10 | 997.53        | 499.27                |
| 585.31        | 293.16                | 5  | P | 9  | 900.48        | 450.74                |
| 672.35        | 336.68                | 6  | S | 8  | <u>803.43</u> | 402.22                |
| 759.38        | 380.19                | 7  | S | 7  | 716.39        | 358.70                |
| 846.41        | 423.71                | 8  | S | 6  | 629.36        | 315.18                |
| 959.49        | 480.25                | 9  | L | 5  | 542.33        | 271.67                |
| 1087.55       | 544.28                | 10 | Q | 4  | 429.25        | 215.13                |
| 1184.61       | 592.81                | 11 | P | 3  | <u>301.19</u> | 151.10                |
| 1241.63       | 621.32                | 12 | G | 2  | 204.13        | 102.57                |
| ---           | ---                   | 13 | K | 1  | 147.11        | 74.06                 |

|                                   |                |
|-----------------------------------|----------------|
| b <sub>3</sub> -H <sub>2</sub> O  | <u>373.2</u>   |
| b <sub>10</sub> -H <sub>2</sub> O | <u>1069.54</u> |
| b <sub>11</sub> -NH <sub>3</sub>  | <u>1167.58</u> |
| b <sub>7</sub> +Phospho+HexNAc    | <u>1042.42</u> |

082813\_SCW\_DrBall\_RNX2 #2342 RT: 67.29 AV: 1 NL: 2.09E3  
T: FTMS + c NSI d Full ms2 557.60@hcd35.00 [100.00-1685.00]

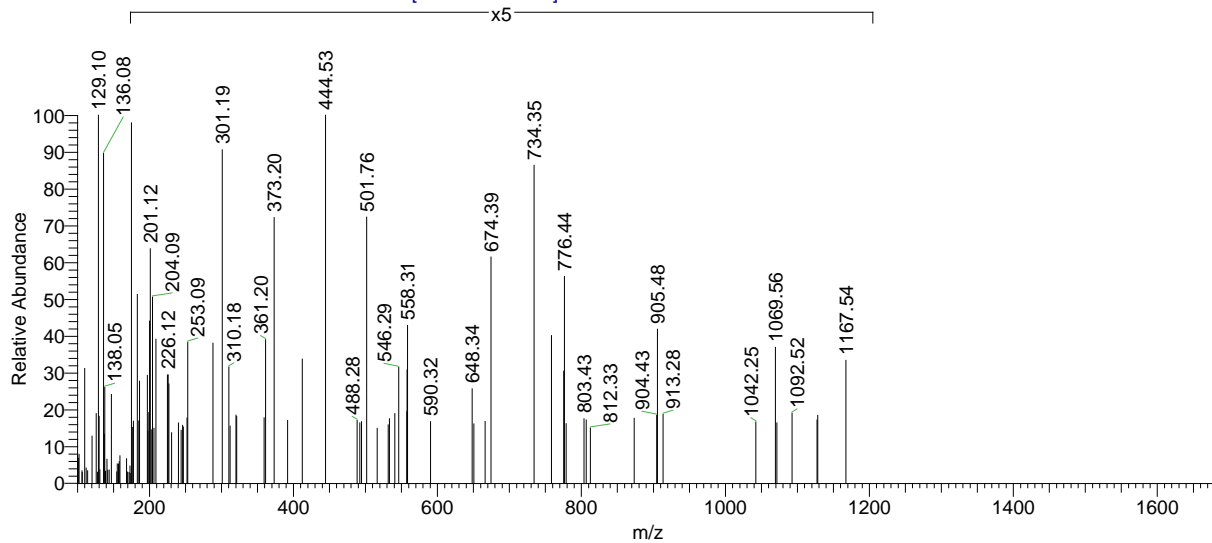

Gene: RUNX2

Acc#: Q13950

26-38 +Phospho, HexNAc

+2 charge state

The HCD fragmentation spectrum contains both modified and unmodified species due to neutral loss of H<sub>3</sub>PO<sub>4</sub> and HexNAc.

| <b>b</b>       | <b>b<sup>+2</sup></b> |    |   |    | <b>y</b>      | <b>y<sup>+2</sup></b> |
|----------------|-----------------------|----|---|----|---------------|-----------------------|
| ---            | ---                   | 1  | R | 13 | ---           | ---                   |
| <u>304.18</u>  | 152.59                | 2  | F | 12 | 1231.63       | 616.32                |
| 391.21         | 196.11                | 3  | S | 11 | 1084.56       | 542.79                |
| 488.26         | 244.63                | 4  | P | 10 | <u>997.53</u> | 499.27                |
| 585.31         | 293.16                | 5  | P | 9  | 900.48        | 450.74                |
| 672.35         | 336.68                | 6  | S | 8  | 803.43        | 402.22                |
| 759.38         | 380.19                | 7  | S | 7  | 716.39        | 358.70                |
| 846.41         | 423.71                | 8  | S | 6  | 629.36        | 315.18                |
| <u>959.49</u>  | 480.25                | 9  | L | 5  | 542.33        | 271.67                |
| <u>1087.55</u> | 544.28                | 10 | Q | 4  | <u>429.25</u> | 215.13                |
| 1184.61        | 592.81                | 11 | P | 3  | <u>301.19</u> | 151.10                |
| 1241.63        | 621.32                | 12 | G | 2  | <u>204.13</u> | 102.57                |
| ---            | ---                   | 13 | K | 1  | <u>147.11</u> | 74.06                 |

|                                   |                |
|-----------------------------------|----------------|
| b <sub>3</sub> -H <sub>2</sub> O  | <u>373.2</u>   |
| b <sub>10</sub> -H <sub>2</sub> O | <u>1069.54</u> |
| b <sub>11</sub> -NH <sub>3</sub>  | <u>1167.58</u> |
| b <sub>3</sub> +Phospho           | <u>471.18</u>  |

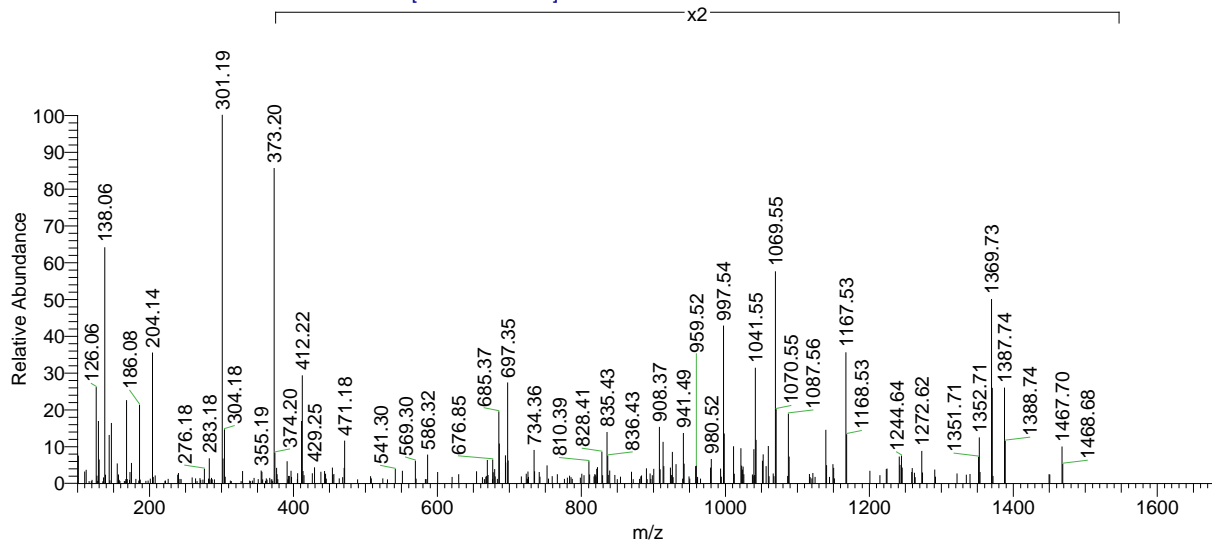



Gene: RUNX2

Acc#: Q13950

27-38 +HexNAc

+2 charge state

The HCD fragmentation spectrum below contains unmodified species due to neutral loss of HexNAc. The ETD fragmentation spectrum localizing modification sites to Ser32 or Ser33 is represented in Fig. 2B.

| <b>b</b>      |    |   |    | <b>y</b>       | <b>y<sup>+</sup></b> |
|---------------|----|---|----|----------------|----------------------|
| ---           | 1  | F | 12 | ---            | ---                  |
| 235.11        | 2  | S | 11 | <u>1084.56</u> | 542.79               |
| 332.16        | 3  | P | 10 | <u>997.53</u>  | <u>499.27</u>        |
| 429.21        | 4  | P | 9  | <u>900.48</u>  | <u>450.74</u>        |
| 516.25        | 5  | S | 8  | <u>803.43</u>  | 402.22               |
| 603.28        | 6  | S | 7  | <u>716.39</u>  | 358.70               |
| 690.31        | 7  | S | 6  | 629.36         | 315.18               |
| 803.39        | 8  | L | 5  | 542.33         | 271.67               |
| <u>931.45</u> | 9  | Q | 4  | 429.25         | 215.13               |
| 1028.50       | 10 | P | 3  | <u>301.19</u>  | 151.10               |
| 1085.53       | 11 | G | 2  | <u>204.13</u>  | 102.57               |
| ---           | 12 | K | 1  | 147.11         | 74.06                |

|                                   |               |
|-----------------------------------|---------------|
| y <sub>8</sub> -H <sub>2</sub> O  | <u>785.38</u> |
| y <sub>10</sub> -H <sub>2</sub> O | <u>979.53</u> |
| y <sub>4</sub> -NH <sub>3</sub>   | <u>412.22</u> |
| y <sub>9</sub> -NH <sub>3</sub>   | <u>883.45</u> |
| y <sub>10</sub> -NH <sub>3</sub>  | <u>980.51</u> |

082813\_SCW\_DrBall\_RNX2\_Rerun #2808 RT: 64.26 AV: 1 NL: 2.24E5  
T: FTMS + c NSI d Full ms2 717.86@hcd35.00 [100.00-1450.00]

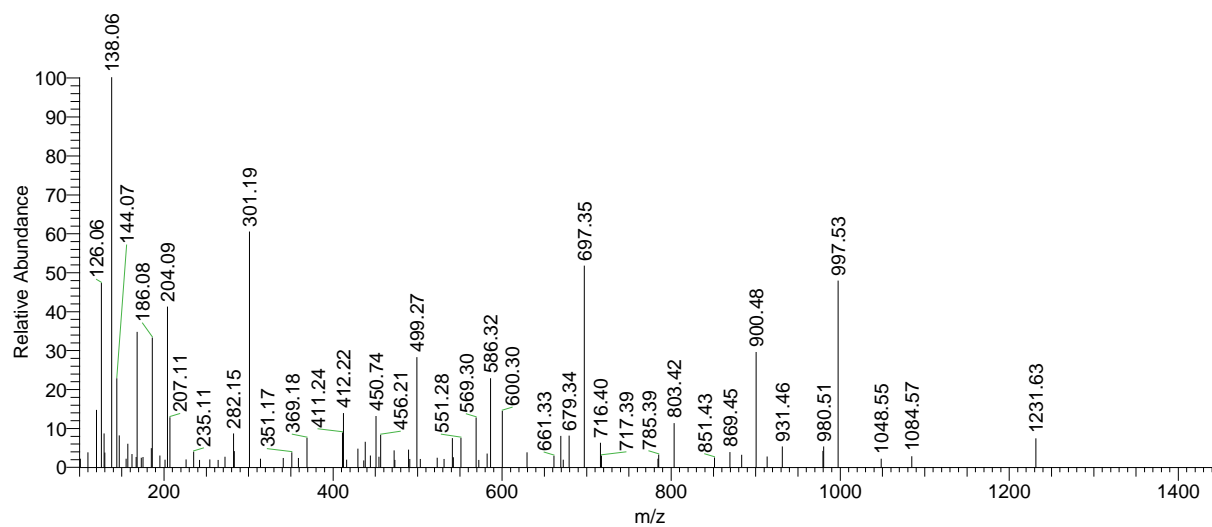

Gene: RUNX2

Acc#: Q13950

259-289 +Methyl at 267

+3 charge state

| <b>b</b>       | <b>b<sup>+2</sup></b> |    |                  |    | <b>y</b>       | <b>y<sup>+2</sup></b> |
|----------------|-----------------------|----|------------------|----|----------------|-----------------------|
| ---            | ---                   | 1  | V                | 31 | ---            | ---                   |
| <u>157.10</u>  | ---                   | 2  | G                | 30 | 3197.61        | 1599.31               |
| 256.17         | ---                   | 3  | V                | 29 | 3140.59        | 1570.80               |
| 353.22         | ---                   | 4  | P                | 28 | 3041.52        | 1521.26               |
| 450.27         | ---                   | 5  | P                | 27 | 2944.47        | 1472.74               |
| 578.33         | ---                   | 6  | Q                | 26 | 2847.41        | 1424.21               |
| 692.37         | ---                   | 7  | N                | 25 | 2719.35        | 1360.18               |
| 789.43         | ---                   | 8  | P                | 24 | 2605.31        | 1303.16               |
| 959.54         | 480.27                | 9  | <b>R(Methyl)</b> | 23 | 2508.26        | 1254.63               |
| 1056.59        | 528.80                | 10 | P                | 22 | 2338.14        | 1169.57               |
| 1143.63        | 572.32                | 11 | S                | 21 | 2241.09        | 1121.05               |
| 1256.71        | 628.86                | 12 | L                | 20 | 2154.06        | 1077.53               |
| 1370.75        | 685.88                | 13 | N                | 19 | 2040.97        | 1020.99               |
| <u>1457.79</u> | 729.40                | 14 | S                | 18 | 1926.93        | 963.97                |
| <u>1528.82</u> | 764.92                | 15 | A                | 17 | 1839.90        | 920.45                |
| 1625.88        | 813.44                | 16 | P                | 16 | <u>1768.86</u> | 884.93                |
| <u>1712.91</u> | 856.96                | 17 | S                | 15 | 1671.81        | 836.41                |
| 1809.96        | 905.48                | 18 | P                | 14 | <u>1584.78</u> | 792.89                |
| 1957.03        | 979.02                | 19 | F                | 13 | 1487.72        | 744.37                |
| 2071.07        | 1036.04               | 20 | N                | 12 | <u>1340.66</u> | 670.83                |
| 2168.12        | 1084.57               | 21 | P                | 11 | <u>1226.61</u> | 613.81                |
| 2296.18        | 1148.60               | 22 | Q                | 10 | <u>1129.56</u> | 565.28                |
| 2353.20        | 1177.11               | 23 | G                | 9  | <u>1001.50</u> | 501.25                |
| 2481.26        | 1241.14               | 24 | Q                | 8  | 944.48         | 472.74                |
| 2568.30        | 1284.65               | 25 | S                | 7  | <u>816.42</u>  | 408.71                |
| 2696.35        | 1348.68               | 26 | Q                | 6  | <u>729.39</u>  | 365.20                |
| 2809.44        | 1405.22               | 27 | I                | 5  | <u>601.33</u>  | 301.17                |
| 2910.49        | 1455.75               | 28 | T                | 4  | 488.25         | 244.63                |
| 3025.51        | 1513.26               | 29 | D                | 3  | 387.20         | 194.10                |
| 3122.57        | 1561.79               | 30 | P                | 2  | <u>272.17</u>  | 136.59                |
| ---            | ---                   | 31 | R                | 1  | <u>175.12</u>  | 88.06                 |

$y_2\text{-NH}_3$       255.15  
 $y_{18}\text{-NH}_3^{+2}$     955.46

082813\_SCW\_DrBall\_RNX2 #3258 RT: 81.97 AV: 1 NL: 1.29E5  
T: FTMS + c NSI d Full ms2 1099.89@hcd35.00 [100.00-2000.00]

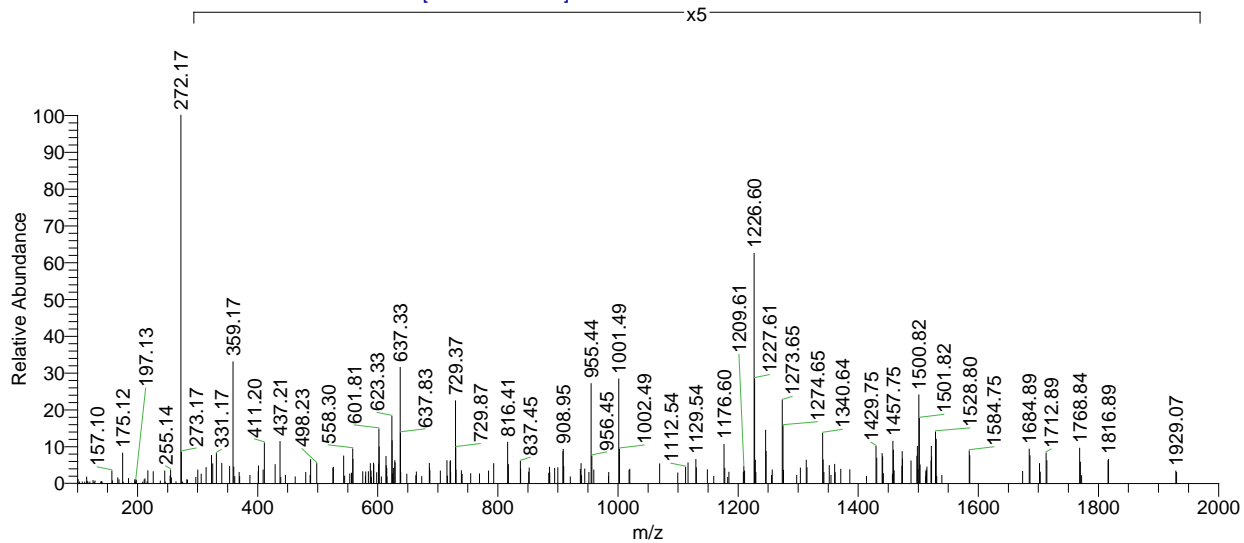

Gene: RUNX2

Acc#: Q13950

259-289 +Dimethyl at 267

+3 charge state

| <b>b</b>                                       | <b>b<sup>+2</sup></b> |    |                    |    | <b>y</b>       | <b>y<sup>+2</sup></b> |
|------------------------------------------------|-----------------------|----|--------------------|----|----------------|-----------------------|
| ---                                            | ---                   | 1  | V                  | 31 | ---            | ---                   |
| <u>157.10</u>                                  | ---                   | 2  | G                  | 30 | 3211.62        | 1606.32               |
| 256.17                                         | ---                   | 3  | V                  | 29 | 3154.60        | 1577.81               |
| 353.22                                         | ---                   | 4  | P                  | 28 | 3055.53        | 1528.27               |
| 450.27                                         | ---                   | 5  | P                  | 27 | 2958.48        | 1479.74               |
| 578.33                                         | ---                   | 6  | Q                  | 26 | 2861.43        | 1431.22               |
| 692.37                                         | ---                   | 7  | N                  | 25 | 2733.37        | 1367.19               |
| 789.43                                         | ---                   | 8  | P                  | 24 | 2619.33        | 1310.17               |
| 973.56                                         | 487.28                | 9  | <b>R(Dimethyl)</b> | 23 | 2522.27        | 1261.64               |
| 1070.61                                        | 535.81                | 10 | P                  | 22 | 2338.14        | 1169.57               |
| 1157.64                                        | 579.32                | 11 | S                  | 21 | 2241.09        | 1121.05               |
| 1270.73                                        | 635.87                | 12 | L                  | 20 | 2154.06        | 1077.53               |
| 1384.77                                        | 692.89                | 13 | N                  | 19 | 2040.97        | 1020.99               |
| <u>1471.80</u>                                 | 736.40                | 14 | S                  | 18 | 1926.93        | 963.97                |
| <u>1542.84</u>                                 | 771.92                | 15 | A                  | 17 | 1839.90        | 920.45                |
| 1639.89                                        | 820.45                | 16 | P                  | 16 | 1768.86        | 884.93                |
| 1726.92                                        | 863.97                | 17 | S                  | 15 | 1671.81        | 836.41                |
| 1823.98                                        | 912.49                | 18 | P                  | 14 | <u>1584.78</u> | 792.89                |
| 1971.04                                        | 986.03                | 19 | F                  | 13 | 1487.72        | 744.37                |
| 2085.09                                        | 1043.05               | 20 | N                  | 12 | 1340.66        | 670.83                |
| 2182.14                                        | 1091.57               | 21 | P                  | 11 | <u>1226.61</u> | 613.81                |
| 2310.20                                        | 1155.60               | 22 | Q                  | 10 | <u>1129.56</u> | 565.28                |
| 2367.22                                        | 1184.11               | 23 | G                  | 9  | <u>1001.50</u> | 501.25                |
| 2495.28                                        | 1248.14               | 24 | Q                  | 8  | 944.48         | 472.74                |
| 2582.31                                        | 1291.66               | 25 | S                  | 7  | <u>816.42</u>  | 408.71                |
| 2710.37                                        | 1355.69               | 26 | Q                  | 6  | 729.39         | 365.20                |
| 2823.45                                        | 1412.23               | 27 | I                  | 5  | 601.33         | 301.17                |
| 2924.50                                        | 1462.75               | 28 | T                  | 4  | 488.25         | 244.63                |
| 3039.53                                        | 1520.27               | 29 | D                  | 3  | 387.20         | 194.10                |
| 3136.58                                        | 1568.79               | 30 | P                  | 2  | <u>272.17</u>  | 136.59                |
| ---                                            | ---                   | 31 | R                  | 1  | <u>175.12</u>  | 88.06                 |
| y <sub>2</sub> -NH <sub>3</sub>                | <u>255.14</u>         |    |                    |    |                |                       |
| y <sub>10</sub> -NH <sub>3</sub>               | <u>1112.53</u>        |    |                    |    |                |                       |
| y <sub>18</sub> -NH <sub>3</sub> <sup>+2</sup> | <u>955.46</u>         |    |                    |    |                |                       |

082813\_SCW\_DrBall\_RNX2 #3298 RT: 82.45 AV: 1 NL: 2.71E5  
T: FTMS + c NSI d Full ms2 1104.90@hcd35.00 [100.00-2000.00]

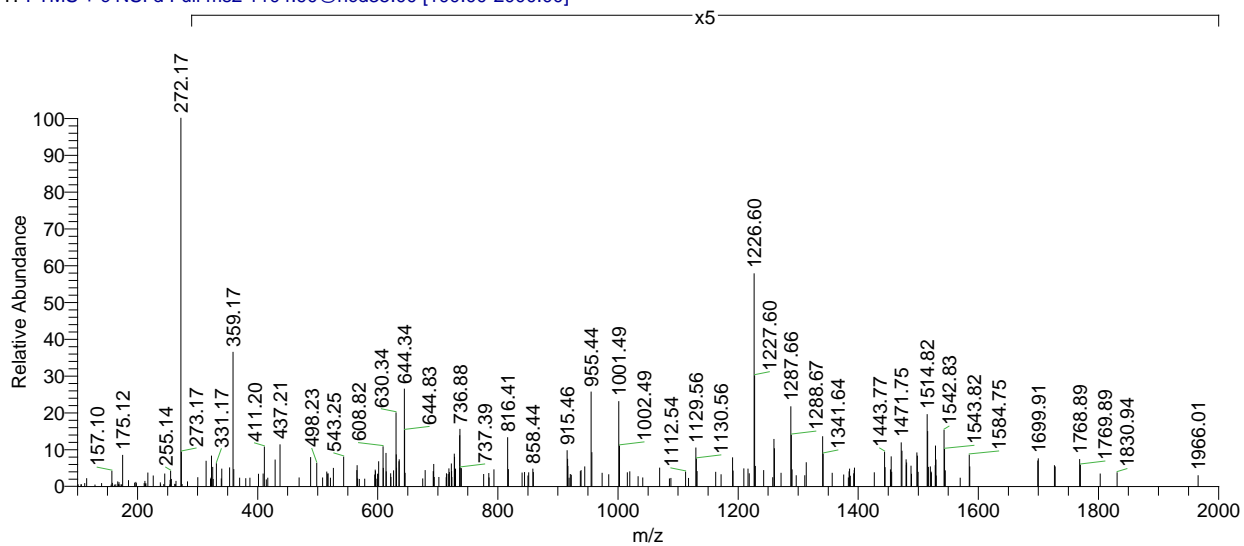

Gene: RUNX2

Acc#: Q13950

338-358 +Phospho at 340

+2 charge state

| <b>b</b>       | <b>b<sup>+2</sup></b> |    |                           |                   | <b>y</b>      | <b>y<sup>+2</sup></b> |
|----------------|-----------------------|----|---------------------------|-------------------|---------------|-----------------------|
| ---            | ---                   | 1  |                           | R                 | ---           | ---                   |
| 270.19         | 135.60                | 2  |                           | I                 | 2338.98       | 1169.99               |
| 437.19         | 219.10                | 3  |                           | <b>S(Phospho)</b> | 2225.89       | 1113.45               |
| 552.22         | 276.61                | 4  |                           | D                 | 2058.90       | 1029.95               |
| 667.24         | 334.13                | 5  |                           | D                 | 1943.87       | 972.44                |
| <u>782.27</u>  | 391.64                | 6  |                           | D                 | 1828.84       | 914.92                |
| 883.32         | 442.16                | 7  |                           | T                 | 1713.82       | 857.41                |
| <u>954.36</u>  | 477.68                | 8  |                           | A                 | 1612.77       | 806.89                |
| 1055.40        | 528.21                | 9  |                           | T                 | 1541.73       | 771.37                |
| 1142.44        | 571.72                | 10 |                           | S                 | 1440.68       | 720.85                |
| <u>1257.46</u> | 629.24                | 11 |                           | D                 | 1353.65       | 677.33                |
| 1404.53        | <u>702.77</u>         | 12 |                           | F                 | 1238.62       | 619.82                |
| 1564.56        | <u>782.78</u>         | 13 | <b>C(Carbamidomethyl)</b> | L                 | 1091.56       | 546.28                |
| <u>1677.65</u> | 839.33                | 14 |                           | L                 | 931.52        | 466.27                |
| 1863.73        | 932.37                | 15 |                           | W                 | <u>818.44</u> | 409.72                |
| 1960.78        | 980.89                | 16 |                           | P                 | <u>632.36</u> | 316.68                |
| 2047.81        | 1024.41               | 17 |                           | S                 | <u>535.31</u> | <u>268.16</u>         |
| 2148.86        | 1074.93               | 18 |                           | T                 | <u>448.28</u> | 224.64                |
| 2261.94        | 1131.47               | 19 |                           | L                 | <u>347.23</u> | 174.12                |
| 2348.97        | 1174.99               | 20 |                           | S                 | <u>234.14</u> | 117.58                |
| ---            | ---                   | 21 |                           | K                 | <u>147.11</u> | 74.06                 |

b<sub>5</sub> neutral loss of H<sub>3</sub>PO<sub>4</sub> 587.28

b<sub>6</sub> neutral loss of H<sub>3</sub>PO<sub>4</sub> 702.31

082813\_SCW\_DrBall\_RNX2 #4349 RT: 99.71 AV: 1 NL: 2.84E4  
T: FTMS + c NSI d Full ms2 1248.55@hcd35.00 [100.00-2000.00]

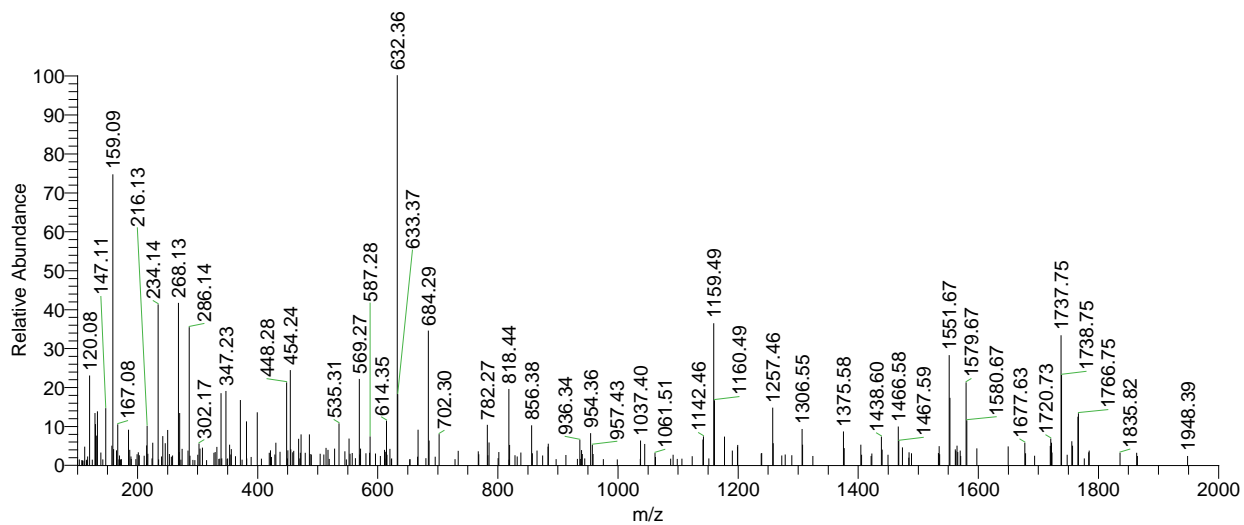



Gene: RUNX2

Acc#: Q13950

359-374 +HexNAc

+3 charge state

The HCD fragmentation spectrum contains both modified and unmodified species due to neutral loss of HexNAc. The ETD fragmentation spectrum localizing the site of modification to Ser371 is represented in Fig 2C.

| <b>b</b>       |    |   |    | <b>y</b>       |
|----------------|----|---|----|----------------|
| ---            | 1  | K | 16 | ---            |
| 216.13         | 2  | S | 15 | <u>1518.72</u> |
| 344.19         | 3  | Q | 14 | 1431.69        |
| 415.23         | 4  | A | 13 | <u>1303.63</u> |
| 472.25         | 5  | G | 12 | <u>1232.59</u> |
| 543.29         | 6  | A | 11 | 1175.57        |
| 630.32         | 7  | S | 10 | <u>1104.53</u> |
| <u>759.36</u>  | 8  | E | 9  | 1017.50        |
| 872.45         | 9  | L | 8  | 888.46         |
| <u>929.47</u>  | 10 | G | 7  | <u>775.37</u>  |
| 1026.52        | 11 | P | 6  | 718.35         |
| 1173.59        | 12 | F | 5  | 621.30         |
| 1260.62        | 13 | S | 4  | 474.23         |
| <u>1375.65</u> | 14 | D | 3  | 387.20         |
| 1472.70        | 15 | P | 2  | <u>272.17</u>  |
| ---            | 16 | R | 1  | 175.12         |

$y_5 + \text{HexNAc}$  824.38

$y_5 - \text{H}_2\text{O}^{+2}$  302.15

$y_9 - \text{H}_2\text{O}^{+2}$  500.25

$y_9 - \text{H}_2\text{O}$  999.49

082813\_SCW\_DrBall\_RNX2 #2560 RT: 70.21 AV: 1 NL: 2.90E4  
T: FTMS + c NSI d Full ms2 617.64@hcd35.00 [100.00-1865.00]

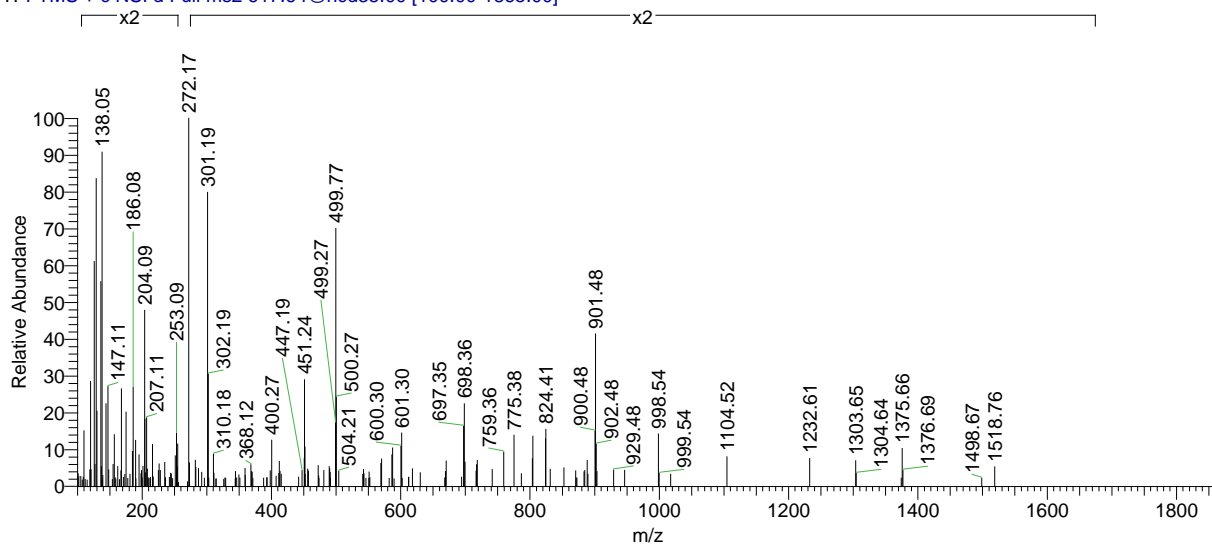

Gene: RUNX2

Acc#: Q13950

375-391 +Methyl at 386

+2 charge state

| <b>b</b>       | <b>b<sup>+2</sup></b> |    |                  |    | <b>y</b>       | <b>y<sup>+2</sup></b> |
|----------------|-----------------------|----|------------------|----|----------------|-----------------------|
| ---            | ---                   | 1  | Q                | 17 | ---            | ---                   |
| 276.13         | ---                   | 2  | F                | 16 | 1838.94        | <u>919.97</u>         |
| 373.19         | ---                   | 3  | P                | 15 | 1691.87        | <u>846.44</u>         |
| 460.22         | ---                   | 4  | S                | 14 | 1594.82        | 797.91                |
| 573.30         | ---                   | 5  | I                | 13 | 1507.79        | 754.40                |
| 660.34         | ---                   | 6  | S                | 12 | <u>1394.70</u> | <u>697.85</u>         |
| 747.37         | ---                   | 7  | S                | 11 | <u>1307.67</u> | <u>654.34</u>         |
| 860.45         | ---                   | 8  | L                | 10 | 1220.64        | <u>610.82</u>         |
| 961.50         | ---                   | 9  | T                | 9  | 1107.55        | 554.28                |
| <u>1090.54</u> | ---                   | 10 | E                | 8  | 1006.51        | 503.76                |
| <u>1177.57</u> | ---                   | 11 | S                | 7  | 877.46         | <u>439.24</u>         |
| 1347.69        | 674.35                | 12 | <b>R(Methyl)</b> | 6  | 790.43         | 395.72                |
| 1494.76        | 747.88                | 13 | F                | 5  | <u>620.32</u>  | 310.66                |
| 1581.79        | 791.40                | 14 | S                | 4  | <u>473.25</u>  | 237.13                |
| <u>1695.83</u> | 848.42                | 15 | N                | 3  | 386.21         | 193.61                |
| <u>1792.89</u> | 896.95                | 16 | P                | 2  | <u>272.17</u>  | 136.59                |
| ---            | ---                   | 17 | R                | 1  | 175.12         | 88.06                 |

y<sub>3</sub>-NH<sub>3</sub>      369.19  
y<sub>6</sub>-NH<sub>3</sub>      773.41  
y<sub>15</sub>-NH<sub>3</sub><sup>+2</sup>    837.93  
MH<sup>+2</sup>        984.00

y<sub>8</sub>-NH<sub>3</sub>      989.48  
y<sub>10</sub>-NH<sub>3</sub>     1203.61  
y<sub>11</sub>-NH<sub>3</sub>     1290.64  
y<sub>12</sub>-NH<sub>3</sub>     1377.68  
y<sub>13</sub>-NH<sub>3</sub>     1490.76  
y<sub>14</sub>-NH<sub>3</sub>     1577.79  
y<sub>15</sub>-NH<sub>3</sub>     1674.84

082813\_SCW\_DrBall\_RNX2\_Rerun #5690 RT: 89.53 AV: 1 NL: 1.92E5  
T: FTMS + c NSI d Full ms2 984.01@hcd35.00 [100.00-1980.00]

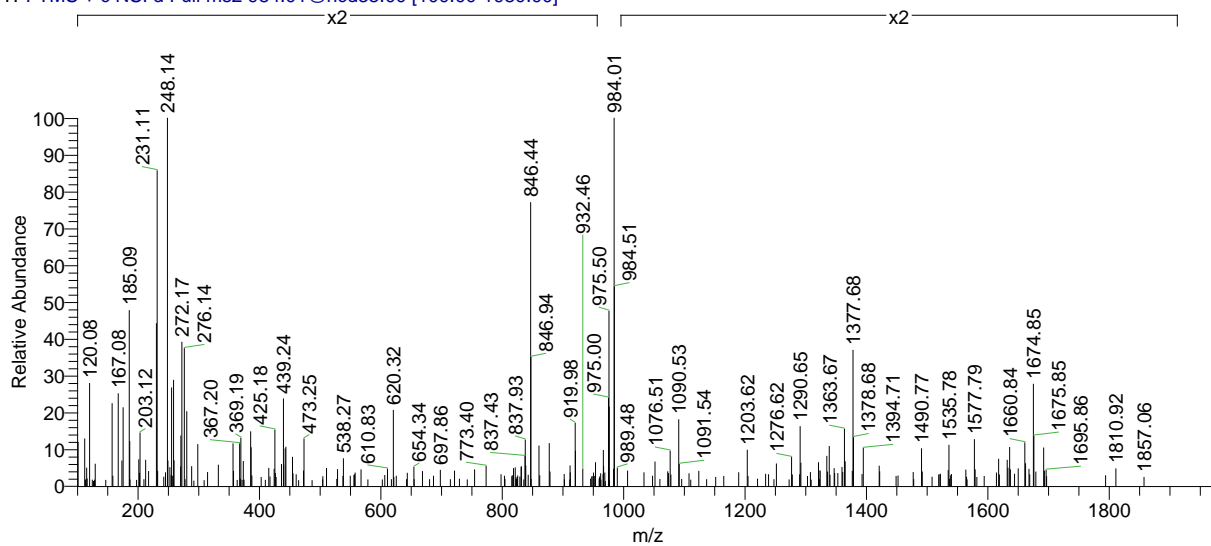

Gene: RUNX2

Acc#: Q13950

375-386 +Dimethyl at 386

+2 charge state

| <b>b</b>       | <b>b<sup>+2</sup></b> |    |                    |    | <b>y</b>      | <b>y<sup>+2</sup></b> |
|----------------|-----------------------|----|--------------------|----|---------------|-----------------------|
| ---            | ---                   | 1  | Q                  | 17 | ---           | ---                   |
| <u>276.13</u>  | ---                   | 2  | F                  | 16 | 1852.96       | 926.98                |
| 373.19         | ---                   | 3  | P                  | 15 | 1705.89       | <u>853.45</u>         |
| 460.22         | ---                   | 4  | S                  | 14 | 1608.83       | 804.92                |
| 573.30         | ---                   | 5  | I                  | 13 | 1521.80       | <u>761.40</u>         |
| 660.34         | ---                   | 6  | S                  | 12 | 1408.72       | <u>704.86</u>         |
| 747.37         | ---                   | 7  | S                  | 11 | 1321.69       | <u>661.35</u>         |
| 860.45         | ---                   | 8  | L                  | 10 | 1234.65       | 617.83                |
| 961.50         | ---                   | 9  | T                  | 9  | 1121.57       | 561.29                |
| 1090.54        | ---                   | 10 | E                  | 8  | 1020.52       | 510.76                |
| 1177.57        | ---                   | 11 | S                  | 7  | 891.48        | <u>446.24</u>         |
| 1361.71        | 681.36                | 12 | <b>R(Dimethyl)</b> | 6  | 804.45        | 402.73                |
| 1508.77        | 754.89                | 13 | F                  | 5  | <u>620.32</u> | 310.66                |
| 1595.81        | 798.41                | 14 | S                  | 4  | <u>473.25</u> | 237.13                |
| 1709.85        | 855.43                | 15 | N                  | 3  | 386.21        | 193.61                |
| <u>1806.90</u> | 903.95                | 16 | P                  | 2  | 272.17        | 136.59                |
| ---            | ---                   | 17 | R                  | 1  | 175.12        | 88.06                 |

y<sub>9</sub>-NH<sub>3</sub> 1104.54

y<sub>12</sub>-NH<sub>3</sub> 1391.69

MH<sup>+2</sup> 991.01

082813\_SCW\_DrBall\_RNX2\_Rerun #5772 RT: 90.26 AV: 1 NL: 1.70E5  
T: FTMS + c NSI d Full ms2 991.52@hcd35.00 [100.00-1995.00]

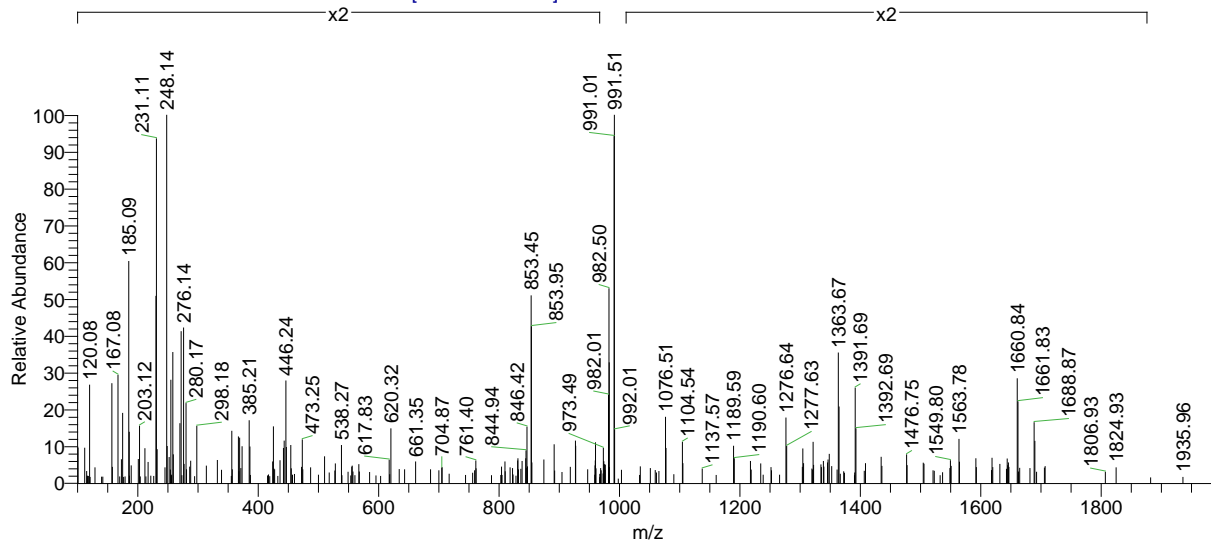

# Supplemental Figure 1

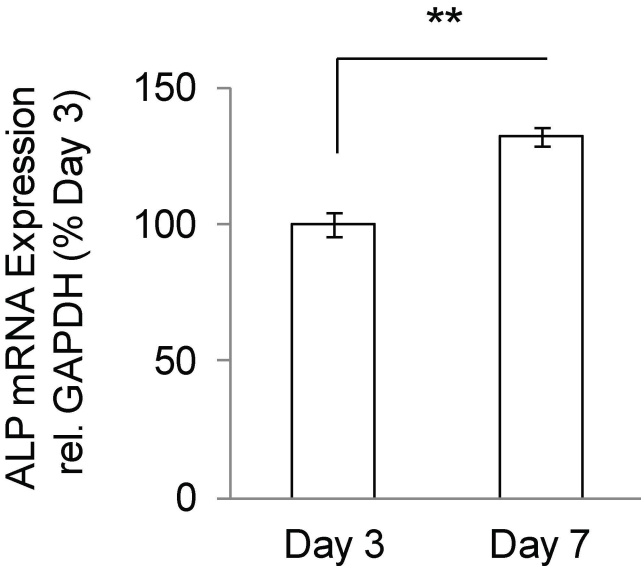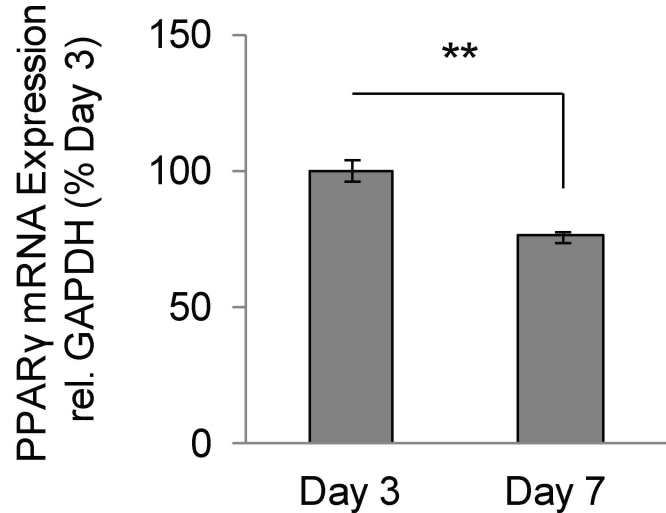

# Supplemental Figure 2

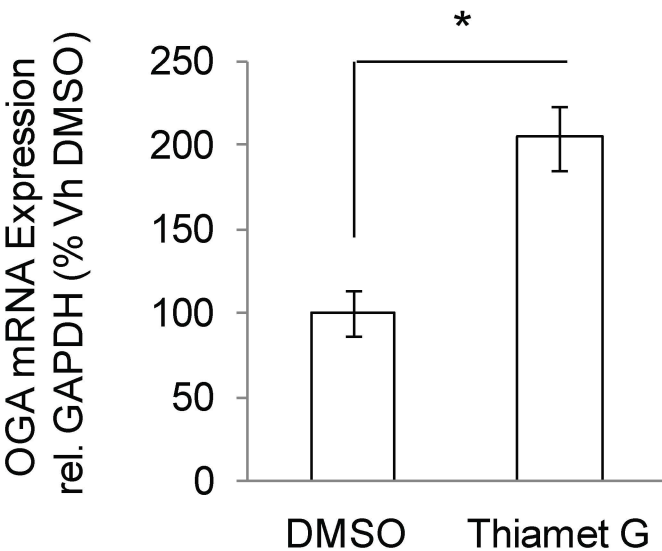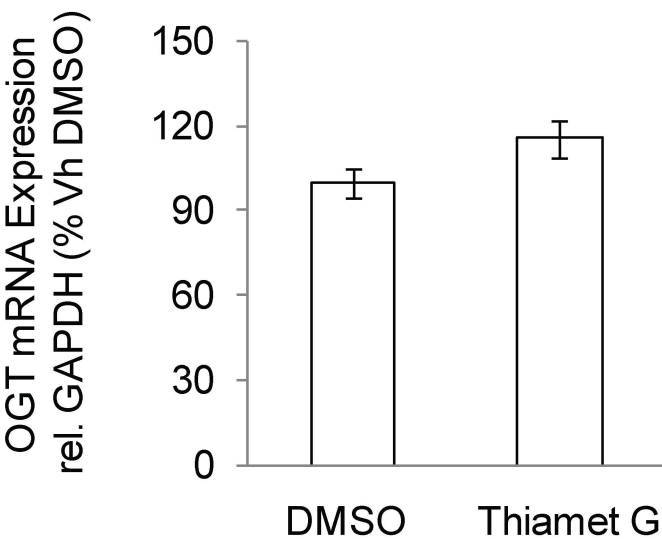



# Supplemental Figure 3

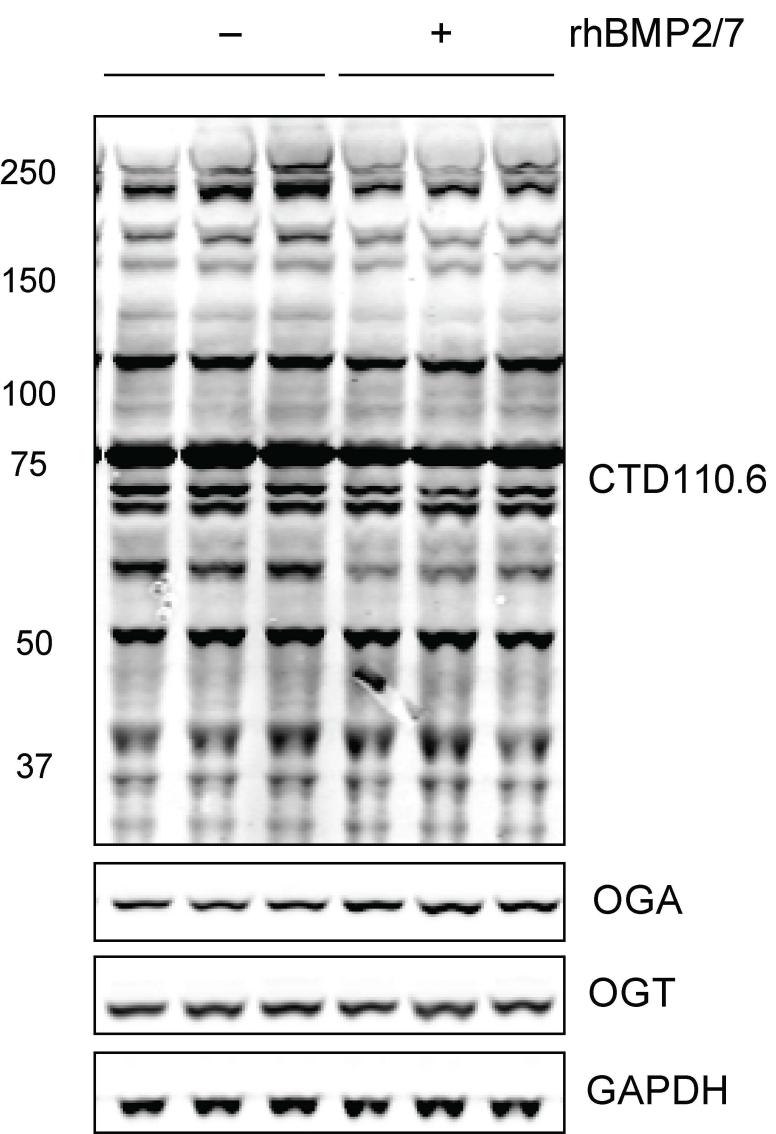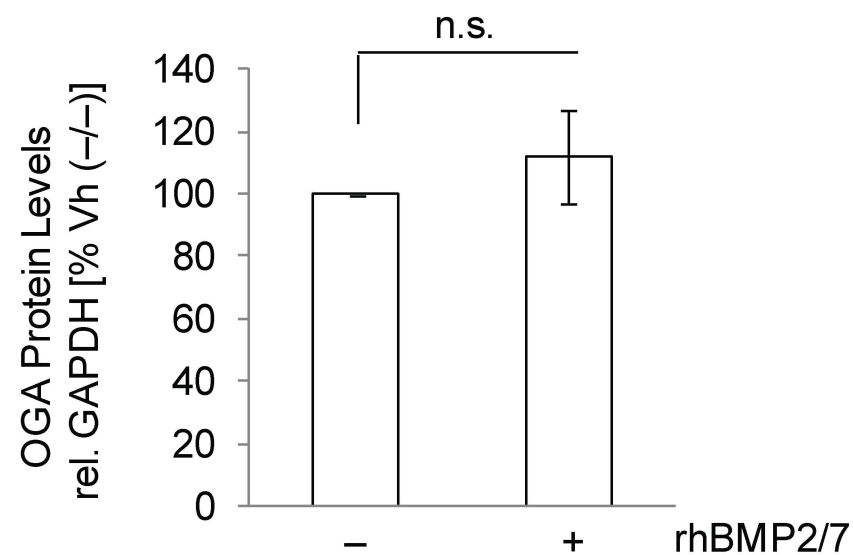

Supplement: supp_M114.040691_SUPPLEMENTAL_FINAL_RESUBMISSION_091914.pdf [file supp_M114.040691_SUPPLEMENTAL_FINAL_RESUBMISSION_091914.pdf]
